# Supplementary material for: Analysis of the surgical strategy and postoperative clinical effect of thoracic ossification of ligament flavum with dural ossification
Source: Frontiers journal article supplement (doi:10.3389/fsurg.2022.1036253), 2022-10-12
Supplement: Table_1.XLS [file Table_1.XLS]

## Sheet: Sheet1
Number	With DO	Age	Sex	BMI	Smoker	Drinking	Hypertension	DM	Preoperative duration of symptoms（mouths）	Operation time (minutes)	EBL(ml)	LOH(days)	Leveals of operation	complications	Pre-mJOA	F/U-mJOA	RR
1	1	57	female	26	No	No	No	No	24	96	260	18	T9-10	CSF leakage	6	9	0.6
2	1	63	female	23	No	No	Yes	No	12	101	360	11	T9-10	CSF leakage	4	7	0.43
3	1	73	female	24	No	No	No	No	12	96	400	9	T11-12	CSF leakage + Superficial infection	5	8	0.5
4	1	75	female	31	No	No	Yes	No	12	86	270	15	T9-10	CSF leakage	3	6	0.38
5	1	49	female	32	No	No	No	No	2	86	260	15	T2-3	CSF leakage	4	7	0.43
6	1	49	female	22	No	No	Yes	Yes	2	86	320	13	T10-11	CSF leakage	3	6	0.38
7	1	46	female	28	No	No	Yes	No	24	91	350	17	T7-8	CSF leakage	7	10	0.75
8	1	57	female	25	No	No	Yes	No	3	96	400	16	T10-11	CSF leakage	4	7	0.43
9	1	69	female	29	No	No	No	Yes	12	101	370	14	T11-12	CSF leakage	5	8	0.5
10	1	66	male	26	Yes	Yes	No	No	12	106	350	15	T10-11	CSF leakage	6	9	0.6
11	1	58	male	25	No	No	Yes	No	60	91	300	10	T11-12	CSF leakage	3	7	0.5
12	1	49	male	26	No	No	Yes	No	4	101	340	13	T2-3	CSF leakage	6	9	0.6
13	0	54	female	28	No	No	No	No	3	75	200	13	T10-11	No	6	9	0.6
14	0	47	female	29	No	No	Yes	No	3	95	300	8	T11-12	No	5	8	0.5
15	0	52	female	26	No	No	No	No	3	85	200	10	T10-11	No	6	9	0.6
16	0	50	female	23	No	No	Yes	No	48	90	200	13	T10-11	No	6	8	0.4
17	0	50	female	22	No	No	No	No	3	75	260	11	T11-12	No	5	8	0.5
18	0	52	female	24	No	No	No	No	3	85	270	10	T10-11	No	4	7	0.43
19	0	67	female	30	No	No	No	No	6	70	250	9	T9-10	No	6	8	0.4
20	0	61	female	31	No	No	No	No	12	75	250	10	T9-10	No	8	10	0.67
21	0	45	male	27	No	No	No	No	4	65	200	5	T9-10	No	5	8	0.5
22	0	70	male	28	No	No	No	No	24	90	300	11	T8-9	No	7	9	0.5
23	0	58	male	34	Yes	Yes	Yes	No	48	90	200	15	T11-12	No	6	9	0.6
24	0	57	male	35	No	No	No	No	12	80	300	10	T11-12	No	5	8	0.5
25	0	50	male	27	No	No	No	No	6	75	330	10	T2-3	No	8	10	0.67
26	0	75	male	22	No	No	No	Yes	12	75	250	10	T11-12	No	7	10	0.75
27	0	69	male	23	No	No	Yes	No	10	65	200	6	T11-12	No	4	7	0.43
28	0	57	male	24	No	No	Yes	No	3	100	300	9	T5-6	No	8	10	0.67
29	0	62	male	28	Yes	Yes	No	No	6	90	350	13	T10-11	No	4	7	0.43
30	0	61	male	23	Yes	Yes	No	No	6	70	200	9	T11-12	No	8	10	0.67
31	0	55	male	27	Yes	Yes	No	No	24	70	250	10	T11-12	No	3	6	0.38
32	0	52	male	26	No	No	Yes	No	6	80	250	9	T1-2	No	4	7	0.43
