# Supplementary material for: Analysis of the surgical strategy and postoperative clinical effect of thoracic ossification of ligament flavum with dural ossification
Source: Frontiers journal article supplement (doi:10.3389/fsurg.2022.1036253), 2022-10-12
Supplement: Table_2.XLS [file Table_2.XLS]

## Sheet: Sheet1
Number	With DO	preoperative Physical Function	postoperation Physical Function	preoperative Social Functioning	postoperative Social Functioning	preoperative Boily Pain	postoperative Boily Pain	preoperative Vitality	postoperation Vitality	preoperative Mental health	postoperation Mental health	preoperative General health	postoperation General health
1	yes	65	85	63	75	74	74	50	70	72	84	55	75
2	yes	45	70	38	63	70	72	40	60	52	68	40	65
3	yes	55	80	50	75	72	72	45	65	52	68	55	65
4	yes	30	60	25	50	62	62	45	60	48	70	45	60
5	yes	45	70	38	63	70	70	40	55	52	68	45	65
6	yes	30	60	25	50	84	84	35	55	52	76	40	60
7	yes	80	95	75	88	62	62	65	70	72	84	60	70
8	yes	45	70	38	63	80	80	40	55	60	76	55	65
9	yes	55	80	50	75	70	72	45	60	64	80	55	75
10	yes	65	80	63	88	72	72	55	65	60	76	60	80
11	yes	30	60	25	50	84	84	35	50	60	70	45	60
12	yes	65	85	63	88	74	80	50	65	68	80	55	80
13	No	65	85	63	88	74	74	50	60	72	72	55	75
14	No	55	80	50	75	70	70	45	60	52	64	50	70
15	No	65	80	63	75	72	72	50	65	56	72	55	70
16	No	60	80	50	75	62	62	50	65	48	64	55	75
17	No	50	80	38	63	70	80	50	60	52	76	50	65
18	No	50	70	38	75	84	84	40	60	56	84	45	65
19	No	65	85	63	75	62	70	55	65	72	80	55	75
20	No	85	95	75	88	80	74	55	65	60	84	65	85
21	No	55	80	50	75	70	70	45	60	64	76	50	70
22	No	80	90	75	88	72	80	50	70	60	72	60	70
23	No	65	85	63	88	84	84	55	65	60	72	55	70
24	No	55	75	38	63	72	80	45	65	68	80	50	70
25	No	85	95	88	100	80	80	55	65	70	84	65	75
26	No	80	95	75	88	74	74	60	70	60	68	60	80
27	No	45	70	25	50	70	70	35	50	35	60	45	65
28	No	85	95	75	88	80	80	65	65	65	80	60	75
29	No	30	65	38	63	72	74	40	55	40	64	40	60
30	No	80	95	75	88	80	80	60	70	65	80	65	80
31	No	30	60	25	63	70	72	35	55	35	68	40	60
32	No	40	70	50	75	72	72	40	55	40	76	45	65
